# Supplementary material
Source: PubMed Central journal article supplement (PMC5509530)
Supplement: NIHMS843529-supplement-Supp_info.pdf [file NIHMS843529-supplement-Supp_info.pdf]

**Supplementary table 1: Comparison of weakness severity in DM patients with and without anti-NXP-2 autoantibodies by individual muscles.**

|                         | <b>Anti-NXP2 +<br/>(n=56)</b> | <b>Anti-NXP2 -<br/>(n=179)</b> | <b>Univariate<br/>p-value</b> | <b>p-value adjusted<br/>for time from<br/>onset</b> |
|-------------------------|-------------------------------|--------------------------------|-------------------------------|-----------------------------------------------------|
| <b>Neck flexors</b>     | 8.4 (2.3)                     | 9.4 (1.5)                      | < 0.001 ***                   | < 0.001 ***                                         |
| <b>Neck extensors</b>   | 9.5 (1.3)                     | 9.9 (0.6)                      | 0.001 **                      | 0.001 **                                            |
| <b>Deltoids</b>         | 7.8 (2.9)                     | 8.7 (2.0)                      | 0.01 *                        | 0.009 **                                            |
| <b>Biceps</b>           | 8.8 (1.5)                     | 9.4 (1.3)                      | 0.006 **                      | 0.003 **                                            |
| <b>Triceps</b>          | 8.7 (1.6)                     | 9.2 (1.4)                      | 0.02 *                        | 0.01 *                                              |
| <b>Wrist flexors</b>    | 9.6 (0.9)                     | 9.9 (0.5)                      | 0.003 **                      | 0.003 **                                            |
| <b>Wrist extensors</b>  | 9.5 (0.9)                     | 9.8 (0.6)                      | 0.004 **                      | 0.004 **                                            |
| <b>Finger flexors</b>   | 9.7 (0.8)                     | 9.8 (0.6)                      | 0.2                           | 0.1                                                 |
| <b>Finger extensors</b> | 9.3 (1.5)                     | 9.8 (0.6)                      | < 0.001 ***                   | < 0.001 ***                                         |
| <b>Hip flexors</b>      | 7.3 (2.9)                     | 8.4 (2.1)                      | 0.002 **                      | 0.001 **                                            |
| <b>Hip extensors</b>    | 9.7 (1.4)                     | 9.7 (0.9)                      | 0.8                           | 0.8                                                 |
| <b>Knee flexors</b>     | 9.6 (0.9)                     | 9.8 (0.6)                      | 0.07                          | 0.05                                                |
| <b>Knee extensors</b>   | 9.5 (1.4)                     | 9.8 (0.6)                      | 0.04 *                        | 0.04 *                                              |
| <b>Ankle flexors</b>    | 9.7 (1.2)                     | 9.9 (0.3)                      | 0.02 *                        | 0.03 *                                              |
| <b>Ankle extensors</b>  | 9.7 (0.7)                     | 10.0 (0.3)                     | < 0.001 ***                   | < 0.001 ***                                         |

\* <0.05; \*\* <0.01; \*\*\* <0.001

Muscle strength is expressed as mean (standard deviation [SD]). The two groups of patients are compared using linear regression.

**Supplementary table 2: Comparison of weakness prevalence in DM patients with and without anti-NXP-2 autoantibodies by individual muscle.**

|                         | <b>Anti-NXP2<br/>+ (n=56)</b> | <b>Anti-NXP2 -<br/>(n=179)</b> | <b>Univariate<br/>p-value</b> | <b>p-value<br/>adjusted for<br/>time from onset</b> |
|-------------------------|-------------------------------|--------------------------------|-------------------------------|-----------------------------------------------------|
| <b>Neck flexors</b>     | 48% (25)                      | 23% (37)                       | < 0.001 ***                   | < 0.001 ***                                         |
| <b>Neck extensors</b>   | 23% (12)                      | 6% (10)                        | 0.002 **                      | 0.001 **                                            |
| <b>Deltoids</b>         | 54% (30)                      | 47% (83)                       | 0.4                           | 0.4                                                 |
| <b>Biceps</b>           | 53% (29)                      | 30% (52)                       | 0.003 **                      | 0.002 **                                            |
| <b>Triceps</b>          | 56% (31)                      | 36% (62)                       | 0.01 *                        | 0.006 **                                            |
| <b>Wrist flexors</b>    | 23% (12)                      | 11% (18)                       | 0.04 *                        | 0.04 *                                              |
| <b>Wrist extensors</b>  | 26% (14)                      | 10% (16)                       | 0.003 **                      | 0.004 **                                            |
| <b>Finger flexors</b>   | 20% (11)                      | 12% (20)                       | 0.2                           | 0.10                                                |
| <b>Finger extensors</b> | 26% (14)                      | 10% (16)                       | 0.005 **                      | 0.003 **                                            |
| <b>Hip flexors</b>      | 77% (43)                      | 61% (107)                      | 0.04 *                        | 0.03 *                                              |
| <b>Hip extensors</b>    | 12% (6)                       | 15% (23)                       | 0.6                           | 0.7                                                 |
| <b>Knee flexors</b>     | 17% (9)                       | 11% (18)                       | 0.2                           | 0.2                                                 |
| <b>Knee extensors</b>   | 19% (10)                      | 13% (22)                       | 0.3                           | 0.3                                                 |
| <b>Ankle flexors</b>    | 11% (6)                       | 5% (8)                         | 0.1                           | 0.08                                                |
| <b>Ankle extensors</b>  | 17% (9)                       | 4% (7)                         | 0.004 **                      | 0.001 **                                            |

\* <0.05; \*\* <0.01; \*\*\* <0.001

Muscle strength is expressed as percentage of patients with full-strength (raw number). The two groups of patients are compared using logistic regression.

## **Supplementary Material**

### **Previous papers describing subcutaneous edema in dermatomyositis**

Gorelik O, Almoznino-Sarafian D, Alon I, Rapoport MJ, Goltsman G, Herbert M, et al. Acute inflammatory myopathy with severe subcutaneous edema, a new variant? report of two cases and review of the literature. *Rheumatol Int.* 2001; 20: 163-6.

Venables GS, Bates D, Cartlidge NE, Hudgson P. Acute polymyositis with subcutaneous oedema. *J Neurol Sci.* 1982; 55: 161-4.

Andonopoulos AP, Gogos CA, Tzanakakis G. Subcutaneous edema: An "unrecognized" feature of acute polymyositis. *Rheumatol Int.* 1993; 13: 159-61.

Smyth AE, Bell AL, Crone M. Acute oedematous dermatomyositis. *Ann Rheum Dis.* 2000; 59: 575.

Mroue KH, Sharara NH, Rbeiz JG, Arayssi TK. A case of edematous dermatomyositis. *J Rheumatol.* 2003; 30: 2722-3.

Thurairajah P, Browne S, Bondeson J. A painful swollen calf. *J R Soc Med.* 2003; 96: 236-7.

Werner de Castro GR, Appenzeller S, Bertolo MB, Costallat LT. Acute dermatomyositis with subcutaneous generalized edema. *Clin Rheumatol*. 2006; 25: 898-900.

Ito Y, Kawabata D, Yukawa N, Yoshifuji H, Usui T, Tanaka M, et al. Severe subcutaneous generalized edema in a patient with dermatomyositis. *Mod Rheumatol*. 2007; 17: 171-3.

Lee KH, Lim SR, Kim YJ, Lee KJ, Myung DS, Jeong HC, et al. Acute dermatomyositis associated with generalized subcutaneous edema. *Rheumatol Int*. 2008; 28: 797-800.

Chai Y, Bertorini TE, Li YD, Mitchell C, Guan H. Limb edema and anasarca associated with severe dermatomyositis: Report of four cases. *Neuromuscul Disord*. 2011; 21: 439-42.

Haroon M, Eltahir A, Harney S. Generalized subcutaneous edema as a rare manifestation of dermatomyositis: Clinical lesson from a rare feature. *J Clin Rheumatol*. 2011; 17: 135-7.

Jung KD, Kim PS, Park HY, Kim CR, Byun JY, Lee DY, et al. Dermatomyositis associated with generalized subcutaneous edema and evans syndrome. *J Am Acad Dermatol.* 2012; 66: 144-7.

Milisenda JC, Doti PI, Prieto-Gonzalez S, Grau JM. Dermatomyositis presenting with severe subcutaneous edema: Five additional cases and review of the literature. *Semin Arthritis Rheum.* 2014; 44: 228-33.

Tu J, McLean-Tooke A, Junckerstorff R. Increasing recognition of dermatomyositis with subcutaneous edema - is this a poorer prognostic marker?. *Dermatol Online J.* 2014; 20: 21244.
